# Supplementary material for: Chronic nicotinamide mononucleotide supplementation elevates blood nicotinamide adenine dinucleotide levels and alters muscle motility in healthy old men
Source: Research Square preprint supplement (doi:10.21203/rs.3.rs-455083/v1), 2021-06-09
Supplement: Supplementary file 1 [file 774b1af272c45baa23f1ddbf.pdf]

### Supplementary Table 1.

Clinical characteristics of 20 study participants completing the 12-week study prior to NMN supplementation, Related to Table 1.

|                                            | Placebo Mean $\pm$ SD(10) | NMN Mean $\pm$ SD(10) | Between group p-value |
|--------------------------------------------|---------------------------|-----------------------|-----------------------|
| Age (year)                                 | 70.1 $\pm$ 5.6            | 69.8 $\pm$ 2.6        | 0.520 <sup>b</sup>    |
| BMI (kg/m <sup>2</sup> )                   | 24.8 $\pm$ 1.2            | 23.7 $\pm$ 1.3        | 0.063 <sup>a</sup>    |
| Fat Mass (%)                               | 26.8 $\pm$ 4.4            | 25.1 $\pm$ 3.2        | 0.343 <sup>a</sup>    |
| SMI (kg/m <sup>2</sup> )                   | 7.79 $\pm$ 0.44           | 7.65 $\pm$ 0.39       | 0.459 <sup>a</sup>    |
| Gait Speed (m/sec)                         | 1.31 $\pm$ 0.19           | 1.50 $\pm$ 0.20       | 0.041 <sup>a*</sup>   |
| A 30-s Chair-Stand Test<br>(Counts/30sec)  | 13.5 $\pm$ 5.2            | 14.8 $\pm$ 4.0        | 0.539 <sup>a</sup>    |
| Right hand grip strength (kg)              | 36.0 $\pm$ 7.1            | 40.1 $\pm$ 3.2        | 0.147 <sup>b</sup>    |
| Left hand grip strength (kg)               | 34.8 $\pm$ 4.8            | 36.1 $\pm$ 5.6        | 0.587 <sup>a</sup>    |
| HbA1c (%)                                  | 5.74 $\pm$ 0.32           | 5.85 $\pm$ 0.58       | 0.939 <sup>b</sup>    |
| FBG (mg/dL)                                | 94.4 $\pm$ 7.8            | 99.0 $\pm$ 9.0        | 0.236 <sup>a</sup>    |
| HOMA-IR                                    | 1.08 $\pm$ 0.38           | 1.35 $\pm$ 0.79       | 0.520 <sup>b</sup>    |
| CT L/S ratio                               | 1.15 $\pm$ 0.11           | 1.15 $\pm$ 0.12       | 0.943 <sup>a</sup>    |
| Visceral adipose tissue (cm <sup>2</sup> ) | 126.3 $\pm$ 38.1          | 129.3 $\pm$ 45.8      | 0.874 <sup>a</sup>    |

a. Inter-group comparisons were made using an unpaired t-test.

b. Inter-group comparisons were made using Mann–Whitney *U* test.

\*P<0.05

**Supplementary Table 2.**  
**The effect of NMN on clinical laboratory data (hematology and CRP).**

|                                            | Placebo<br>Mean ± SD (n) | NMN<br>Mean ± SD (n) | Between<br>group p-value |                                       | Placebo<br>Mean ± SD (n) | NMN<br>Mean ± SD (n) | Between<br>group p-value |
|--------------------------------------------|--------------------------|----------------------|--------------------------|---------------------------------------|--------------------------|----------------------|--------------------------|
| <b>WBC (x10<sup>3</sup>counts/μL)</b>      |                          |                      |                          | <b>RBC (x10<sup>3</sup>counts/μL)</b> |                          |                      |                          |
| Baseline                                   | 6.96 ± 1.34 (21)         | 6.13 ± 1.48 (21)     | 0.019 <sup>b*</sup>      | Baseline                              | 476.4 ± 33.6 (21)        | 490.6 ± 35.6 (21)    | 0.190 <sup>a</sup>       |
| Week 12                                    | 5.61 ± 0.78 (10)         | 4.85 ± 0.87 (10)     | 0.054 <sup>a</sup>       | Week 12                               | 462.6 ± 28.2 (10)        | 464.6 ± 30.9 (10)    | 0.882 <sup>a</sup>       |
| Change from<br>Baseline to<br>Week 12      | -1.25 ± 0.87 (10)        | -0.75 ± 1.20 (10)    | 0.416 <sup>c</sup>       | Change from<br>Baseline to<br>Week 12 | -16.8 ± 19.7 (10)        | -17.1 ± 14.1 (10)    | 0.974 <sup>c</sup>       |
| <b>Platelet (x10<sup>4</sup>counts/μL)</b> |                          |                      |                          | <b>Hemoglobin (g/dL)</b>              |                          |                      |                          |
| Baseline                                   | 22.8 ± 5.81 (21)         | 23.0 ± 5.50 (21)     | 0.850 <sup>b</sup>       | Baseline                              | 14.7 ± 0.91 (21)         | 15.2 ± 0.91 (21)     | 0.091 <sup>a</sup>       |
| Week 12                                    | 23.3 ± 5.76 (10)         | 22.2 ± 2.90 (10)     | 0.606 <sup>a</sup>       | Week 12                               | 14.4 ± 0.53 (10)         | 14.5 ± 0.65 (10)     | 0.555 <sup>a</sup>       |
| Change from<br>Baseline to<br>Week 12      | 0.2 ± 1.90 (10)          | -1.0 ± 2.99 (10)     | 0.272 <sup>a</sup>       | Change from<br>Baseline to<br>Week 12 | -0.4 ± 0.57 (10)         | -0.6 ± 0.34 (10)     | 0.963 <sup>c</sup>       |
| <b>CRP (mg/dL)</b>                         |                          |                      |                          | <b>Hematocrit (%)</b>                 |                          |                      |                          |
| Baseline                                   | 0.115 ± 0.162 (21)       | 0.070 ± 0.059 (21)   | 0.569 <sup>b</sup>       | Baseline                              | 43.8 ± 2.26 (21)         | 44.8 ± 2.59 (21)     | 0.170 <sup>a</sup>       |
| Week 12                                    | 0.231 ± 0.506 (10)       | 0.086 ± 0.106 (10)   | 0.760 <sup>b</sup>       | Week 12                               | 43.0 ± 1.47 (10)         | 43.0 ± 2.13 (10)     | 0.990 <sup>a</sup>       |
| Change from<br>Baseline to<br>Week 12      | 0.162 ± 0.516 (10)       | 0.043 ± 0.104 (10)   | 0.344 <sup>c</sup>       | Change from<br>Baseline to<br>Week 12 | -0.8 ± 1.83 (10)         | -1.4 ± 1.29 (10)     | 0.558 <sup>c</sup>       |

- a. Inter-group comparisons were made using an unpaired t-test.  
b. Inter-group comparisons were made using the Mann–Whitney *U* test.  
c. Inter-group comparisons were made using ANCOVA for adjusting the baseline  
\*P<0.05

### Supplementary Table 3.

#### The effect of NMN on clinical laboratory data (hematology and CRP) (blood chemistry).

|                                       | Placebo<br>Mean ± SD (n) | NMN<br>Mean ± SD (n) | Between<br>group p-value |                                       | Placebo<br>Mean ± SD (n) | NMN<br>Mean ± SD (n) | Between<br>group p-value |
|---------------------------------------|--------------------------|----------------------|--------------------------|---------------------------------------|--------------------------|----------------------|--------------------------|
| <b>TP (g/dL)</b>                      |                          |                      |                          | <b>BUN (mg/dL)</b>                    |                          |                      |                          |
| Baseline                              | 7.31 ± 0.38 (21)         | 7.46 ± 0.31 (21)     | 0.191 <sup>a</sup>       | Baseline                              | 14.1 ± 3.07 (21)         | 15.1 ± 2.56 (21)     | 0.241 <sup>a</sup>       |
| Week 12                               | 6.90 ± 0.29 (10)         | 6.98 ± 0.34 (10)     | 0.576 <sup>a</sup>       | Week 12                               | 13.9 ± 1.92 (10)         | 13.4 ± 2.49 (10)     | 0.670 <sup>a</sup>       |
| Change from<br>Baseline to<br>Week 12 | 7.32 ± 0.40 (10)         | 7.49 ± 0.34 (10)     | 0.779 <sup>c</sup>       | Change from<br>Baseline to<br>Week 12 | -0.0 ± 2.72 (10)         | -1.2 ± 2.42 (10)     | 0.388 <sup>c</sup>       |
| <b>Albumin (g/dL)</b>                 |                          |                      |                          | <b>Creatinine (mg/dL)</b>             |                          |                      |                          |
| Baseline                              | 4.30 ± 0.23 (21)         | 4.38 ± 0.22 (21)     | 0.244 <sup>a</sup>       | Baseline                              | 0.913 ± 0.12 (21)        | 0.900 ± 0.14 (21)    | 0.687 <sup>a</sup>       |
| Week 12                               | 4.05 ± 0.17 (10)         | 4.19 ± 0.17 (10)     | 0.086 <sup>a</sup>       | Week 12                               | 0.950 ± 0.16 (10)        | 0.870 ± 0.16 (10)    | 0.253 <sup>a</sup>       |
| Change from<br>Baseline to<br>Week 12 | -0.26 ± 0.13 (10)        | -0.26 ± 0.16 (10)    | 0.294 <sup>c</sup>       | Change from<br>Baseline to<br>Week 12 | 0.021 ± 0.05 (10)        | 0.000 ± 0.03 (10)    | 0.372 <sup>c</sup>       |
| <b>AST (U/L)</b>                      |                          |                      |                          | <b>Uric acid (mg/dL)</b>              |                          |                      |                          |
| Baseline                              | 19.6 ± 4.82 (21)         | 21.8 ± 4.28 (21)     | 0.073 <sup>b</sup>       | Baseline                              | 6.00 ± 1.26 (21)         | 5.36 ± 1.01 (21)     | 0.078 <sup>a</sup>       |
| Week 12                               | 20.1 ± 4.48 (10)         | 23.8 ± 6.30 (10)     | 0.148 <sup>a</sup>       | Week 12                               | 6.14 ± 1.09 (10)         | 5.56 ± 1.24 (10)     | 0.282 <sup>a</sup>       |
| Change from<br>Baseline to<br>Week 12 | 0.40 ± 2.88 (10)         | 1.40 ± 4.72 (10)     | 0.448 <sup>c</sup>       | Change from<br>Baseline to<br>Week 12 | 0.11 ± 0.68 (10)         | 0.06 ± 0.56 (10)     | 0.744 <sup>c</sup>       |
| <b>ALT (U/L)</b>                      |                          |                      |                          | <b>Na (mEq/L)</b>                     |                          |                      |                          |
| Baseline                              | 18.0 ± 7.73 (21)         | 21.7 ± 8.61 (21)     | 0.073 <sup>b</sup>       | Baseline                              | 140.3 ± 1.15 (21)        | 139.8 ± 1.44 (21)    | 0.268 <sup>b</sup>       |
| Week 12                               | 19.1 ± 7.41 (10)         | 23.6 ± 7.60 (10)     | 0.197 <sup>a</sup>       | Week 12                               | 140.1 ± 1.37 (10)        | 139.9 ± 1.37 (10)    | 0.748 <sup>a</sup>       |
| Change from<br>Baseline to<br>Week 12 | 0.4 ± 6.22 (10)          | 1.8 ± 5.73 (10)      | 0.456 <sup>c</sup>       | Change from<br>Baseline to<br>Week 12 | 0.1 ± 0.88 (10)          | -0.4 ± 1.26 (10)     | 0.387 <sup>c</sup>       |
| <b>γGTP (U/L)</b>                     |                          |                      |                          | <b>K (mEq/L)</b>                      |                          |                      |                          |
| Baseline                              | 32.4 ± 17.2 (21)         | 31.4 ± 16.7 (21)     | 0.840 <sup>b</sup>       | Baseline                              | 4.28 ± 0.30 (21)         | 4.22 ± 0.27 (21)     | 0.484 <sup>a</sup>       |
| Week 12                               | 36.5 ± 32.0 (10)         | 36.7 ± 13.0 (10)     | 0.344 <sup>b</sup>       | Week 12                               | 4.34 ± 0.18 (10)         | 4.31 ± 0.37 (10)     | 0.821 <sup>a</sup>       |
| Change from<br>Baseline to<br>Week 12 | 5.5 ± 29.9 (10)          | -0.4 ± 6.78 (10)     | 0.685 <sup>c</sup>       | Change from<br>Baseline to<br>Week 12 | 0.08 ± 0.24 (10)         | 0.15 ± 0.31 (10)     | 0.822 <sup>c</sup>       |

a. Inter-group comparisons were made using an unpaired t-test.

b. Inter-group comparisons were made using Mann–Whitney *U* test.

c. Inter-group comparisons were made using ANCOVA for adjusting the baseline

**Supplementary Table 4.**  
**NMN supplementation does not affect metabolic parameters. Related to Figure 3.**

|                                       | Placebo<br>Mean ± SD (n) | NMN<br>Mean ± SD (n) | Between<br>group<br>p-value |                                       | Placebo<br>Mean ± SD (n) | NMN<br>Mean ± SD (n) | Between<br>group<br>p-value |
|---------------------------------------|--------------------------|----------------------|-----------------------------|---------------------------------------|--------------------------|----------------------|-----------------------------|
| <b>Triglycerides (mg/dL)</b>          |                          |                      |                             | <b>HDL Cholesterol (mg/dL)</b>        |                          |                      |                             |
| Baseline                              | 114.6 ± 49.5 (21)        | 116.5 ± 42.4 (21)    | 0.897 <sup>a</sup>          | Baseline                              | 62.8 ± 14.1 (21)         | 61.6 ± 17.4 (21)     | 0.803 <sup>a</sup>          |
| Week 12                               | 82.4 ± 36.8 (10)         | 107.6 ± 37.0 (10)    | 0.045 <sup>b</sup>          | Week 12                               | 58.7 ± 15.2 (10)         | 62.1 ± 16.4 (10)     | 0.635 <sup>a</sup>          |
| Change from<br>Baseline to<br>Week 12 | -19.8 ± 26.3 (10)        | -9.1 ± 14.2 (10)     | 0.133 <sup>c</sup>          | Change from<br>Baseline to<br>Week 12 | -2.5 ± 4.2 (10)          | -5.2 ± 3.9 (10)      | 0.233 <sup>c</sup>          |
| <b>LDL Cholesterol (mg/dL)</b>        |                          |                      |                             | <b>Interleukin-6 (pg/mL)</b>          |                          |                      |                             |
| Baseline                              | 134.4 ± 26.5 (21)        | 125.7 ± 36.8 (21)    | 0.386 <sup>a</sup>          | Baseline                              | 1.66 ± 0.62 (21)         | 1.29 ± 0.75 (21)     | 0.031 <sup>b*</sup>         |
| Week 12                               | 121.8 ± 17.0 (10)        | 109.0 ± 36.8 (10)    | 0.331 <sup>a</sup>          | Week 12                               | 1.50 ± 0.62 (10)         | 1.39 ± 0.81 (10)     | 0.403 <sup>b</sup>          |
| Change from<br>Baseline to<br>Week 12 | -10.4 ± 14.5 (10)        | -16.4 ± 10.3 (10)    | 0.311 <sup>c</sup>          | Change from<br>Baseline to<br>Week 12 | -0.28 ± 0.94 (10)        | 0.49 ± 0.67 (10)     | 0.762 <sup>c</sup>          |
| <b>Adiponectin (µg/mL)</b>            |                          |                      |                             |                                       |                          |                      |                             |
| Baseline                              | 8.59 ± 2.70 (21)         | 8.95 ± 4.91 (21)     | 0.460 <sup>b</sup>          |                                       |                          |                      |                             |
| Week 12                               | 8.76 ± 2.93 (10)         | 8.35 ± 3.50 (10)     | 0.780 <sup>a</sup>          |                                       |                          |                      |                             |
| Change from<br>Baseline to<br>Week 12 | -0.21 ± 0.87 (10)        | 0.03 ± 1.15 (10)     | 0.669 <sup>c</sup>          |                                       |                          |                      |                             |

a. Inter-group comparisons were made using an unpaired t-test.

b. Inter-group comparisons were made using Mann–Whitney *U* test.

c. Inter-group comparisons were made using ANCOVA for adjusting the baseline

\*P<0.05

## Supplementary Table 5.

### The effect of NMN on auditory and cognitive functions

|                                                          | Placebo<br>Mean ± SD (n) | NMN<br>Mean ± SD (n) | Between<br>group p-value |                                                      | Placebo<br>Mean ± SD (n) | NMN<br>Mean ± SD (n) | Between<br>group p-value |
|----------------------------------------------------------|--------------------------|----------------------|--------------------------|------------------------------------------------------|--------------------------|----------------------|--------------------------|
| <b>Hearing Testing (Right/dB) p= 0.0268<sup>b*</sup></b> |                          |                      |                          | <b>Hearing Testing (Left/dB) p=0.636<sup>b</sup></b> |                          |                      |                          |
| Baseline                                                 | 23.8 ± 12.2 (21)         | 27.2 ± 14.0 (21)     | 0.512 <sup>d</sup>       | Baseline                                             | 21.6 ± 8.60 (21)         | 30.9 ± 16.6 (21)     | 0.072 <sup>d</sup> .     |
| Week 6                                                   | 24.6 ± 13.0 (21)         | 27.6 ± 14.3 (21)     | 0.504 <sup>d</sup>       | Week 6                                               | 21.9 ± 9.07 (21)         | 31.5 ± 16.6 (21)     | 0.051 <sup>d</sup> .     |
| Week 12                                                  | 20.3 ± 10.2 (10)         | 25.8 ± 9.6 (10)      | 0.229 <sup>c</sup>       | Week 12                                              | 19.3 ± 9.00 (10)         | 31.0 ± 13.5 (10)     | 0.019 <sup>d*</sup>      |
| Change from<br>Baseline to Week 6                        | 0.8 ± 2.7 (21)           | 0.4 ± 3.1 (21)       | 0.610 <sup>e</sup>       | Change from<br>Baseline to Week 6                    | 0.30 ± 3.76 (21)         | 0.66 ± 3.91 (21)     | 0.617 <sup>e</sup>       |
| Change from<br>Baseline to<br>Week 12                    | 2.1 ± 2.7 (10)           | -0.1 ± 2.2 (10)      | 0.117 <sup>e</sup>       | Change from<br>Baseline to<br>Week 12                | 1.14 ± 2.40 (10)         | 0.63 ± 3.02 (10)     | 0.766 <sup>e</sup>       |
| <b>MMSE-J(score)</b>                                     |                          |                      |                          | <b>MOCA-J(score)</b>                                 |                          |                      |                          |
| Baseline                                                 | 28.4 ± 1.72 (21)         | 28.1 ± 2.23 (21)     | 0.768 <sup>d</sup>       | Baseline                                             | 24.9 ± 2.49 (21)         | 24.9 ± 2.43 (21)     | 1.000 <sup>c</sup>       |
| Week 12                                                  | 28.9 ± 1.10 (10)         | 27.8 ± 1.81 (10)     | 0.130 <sup>d</sup>       | Week 12                                              | 26.0 ± 2.00 (10)         | 26.7 ± 1.83 (10)     | 0.425 <sup>c</sup>       |
| Change from<br>Baseline to<br>Week 12                    | 1.0 ± 1.33 (10)          | -0.5 ± 2.07 (10)     | 0.100 <sup>e</sup> .     | Change from<br>Baseline to<br>Week 12                | 0.3 ± 2.11 (10)          | 1.0 ± 2.36 (10)      | 0.403 <sup>e</sup>       |

a. Treatment was compared using a mixed model analysis. The p-value denotes interaction.

b. Treatment was compared using MMRM. p-value denotes interaction.

c. Inter-group comparisons were made using an unpaired t-test (no adjustment for baseline).

d. Inter-group comparisons were made using the Mann–Whitney *U* test (no adjustment for baseline).

e. Inter-group comparisons were made using ANCOVA for adjusting the baseline.

\*P<0.05

**Supplementary Table 6. The effect of NMN on BMI and vascular function**

|                                                                        | Placebo<br>Mean ± SD (n) | NMN<br>Mean ± SD (n) | Between<br>group p-value |                                                                                | Placebo<br>Mean ± SD (n) | NMN<br>Mean ± SD (n) | Between<br>group p-value |
|------------------------------------------------------------------------|--------------------------|----------------------|--------------------------|--------------------------------------------------------------------------------|--------------------------|----------------------|--------------------------|
| <b>BMI (kg/m<sup>2</sup>) p=0.341<sup>a</sup>, p=0.851<sup>b</sup></b> |                          |                      |                          | <b>Systolic Blood Pressure (mmHg) p=0.969<sup>a</sup>, p=0.431<sup>b</sup></b> |                          |                      |                          |
| Baseline                                                               | 24.5 ± 1.36 (21)         | 24.1 ± 1.44 (21)     | 0.283 <sup>d</sup>       | Baseline                                                                       | 130.6 ± 19.6 (21)        | 129.5 ± 15.3 (21)    | 0.950 <sup>d</sup>       |
| Week 6                                                                 | 24.4 ± 1.32 (21)         | 24.0 ± 1.44 (21)     | 0.283 <sup>d</sup>       | Week 6                                                                         | 126.1 ± 19.4 (21)        | 129.2 ± 16.1 (21)    | 0.577 <sup>c</sup>       |
| Week 12                                                                | 24.6 ± 1.24 (10)         | 23.5 ± 1.23 (10)     | 0.670 <sup>c</sup>       | Week 12                                                                        | 128.8 ± 20.5 (10)        | 131.7 ± 25.1 (10)    | 0.781 <sup>c</sup>       |
| Change from<br>Baseline to<br>Week 6                                   | -0.06 ± 0.34 (21)        | -0.08 ± 0.24 (21)    | 0.752 <sup>a</sup>       | Change from<br>Baseline to<br>Week 6                                           | -4.4 ± 11.9 (21)         | -0.2 ± 7.8 (21)      | 0.194 <sup>e</sup>       |
| Change from<br>Baseline to<br>Week 12                                  | -0.26 ± 0.37 (10)        | -0.25 ± 0.45 (10)    | 0.830 <sup>a</sup>       | Change from<br>Baseline to<br>Week 12                                          | 1.8 ± 13.0 (10)          | -4.2 ± 13.0 (10)     | 0.333 <sup>e</sup>       |
| <b>Flow Mediated Dilatation (%) p=0.420<sup>b</sup></b>                |                          |                      |                          | <b>Diastolic blood pressure(mmHg) p=0.153<sup>b</sup></b>                      |                          |                      |                          |
| Baseline                                                               | 4.00 ± 1.56 (21)         | 4.09 ± 1.52 (21)     | 0.85 <sup>c</sup>        | Baseline                                                                       | 79.9 ± 9.4 (21)          | 81.3 ± 11.8 (21)     | 0.632 <sup>d</sup>       |
| Week 6                                                                 | 3.80 ± 1.93 (21)         | 3.84 ± 1.79 (21)     | 0.941 <sup>c</sup>       | Week 6                                                                         | 81.4 ± 12.2 (21)         | 82.6 ± 11.2 (21)     | 0.744 <sup>c</sup>       |
| Week 12                                                                | 3.77 ± 1.38 (10)         | 3.85 ± 1.35 (10)     | 0.897 <sup>c</sup>       | Week 12                                                                        | 81.2 ± 8.9 (10)          | 81.7 ± 11.0 (10)     | 0.912 <sup>c</sup>       |
| Change from<br>Baseline to<br>Week 6                                   | -0.20 ± 1.46 (21)        | -0.24 ± 2.25 (21)    | 0.936 <sup>c</sup>       | Change from<br>Baseline to<br>Week 6                                           | 1.5 ± 7.3 (21)           | 1.3 ± 4.6 (21)       | 0.955 <sup>e</sup>       |
| Change from<br>Baseline to<br>Week 12                                  | -0.20 ± 2.10 (10)        | -0.25 ± 1.72 (10)    | 0.925 <sup>a</sup>       | Change from<br>Baseline to<br>Week 12                                          | 0.0 ± 6.6 (10)           | -3.5 ± 8.1 (10)      | 0.464 <sup>e</sup>       |

- a. Treatment was compared using a mixed model analysis. The p-value denotes interaction.
- b. Treatment was compared using MMRM. p-value denotes interaction.
- c. Inter-group comparisons were made using an unpaired t-test (no adjustment for baseline).
- d. Inter-group comparisons were made using the Mann–Whitney *U* test (no adjustment for baseline).
- e. Inter-group comparisons were made using ANCOVA for adjusting the baseline.
